# Supplementary material
Source: ML conference proceedings conference paper supplement (https://proceedings.mlr.press/v33/begin14.html)
Supplement: Supplementary file 1 [file begin14-supp.pdf]

---

## PAC-Bayesian Theory for Transductive Learning: Supplementary Material

---

**Lemma S9.** *Let  $\beta \in [0, 1]$ ,  $q \in [0, 1]$  and  $p \in (0, 1)$ . We have*

$$\mathcal{D}_\beta^*(q, p) = \mathcal{D}_{\text{KL}}(q, p) + \frac{1-\beta}{\beta} \mathcal{D}_{\text{KL}}\left(\frac{p-\beta q}{1-\beta}, p\right),$$

where  $\mathcal{D}_{\text{KL}}(\cdot, \cdot)$  and  $\mathcal{D}_\beta^*(\cdot, \cdot)$  are defined respectively by Equations (3) and (8) of the main paper.

*Proof.*

$$\begin{aligned} & \mathcal{D}_\beta^*(q, p) \\ &= q \ln \beta \frac{q}{p} + \left(\frac{p}{\beta} - q\right) \ln(1 - \beta \frac{q}{p}) + (1-q) \ln \beta \frac{1-q}{1-p} + \left(\frac{1-p}{\beta} + q - 1\right) \ln(1 - \beta \frac{1-q}{1-p}) - \ln \beta - \left(\frac{1}{\beta} - 1\right) \ln(1 - \beta) \\ &= q \ln \frac{q}{p} + q \ln \beta + \left(\frac{p}{\beta} - q\right) \ln(1 - \beta \frac{q}{p}) + (1-q) \ln \frac{1-q}{1-p} + (1-q) \ln \beta + \left(\frac{1-p}{\beta} + q - 1\right) \ln(1 - \beta \frac{1-q}{1-p}) - \ln \beta \\ &\quad - \left(\frac{1}{\beta} - 1\right) \ln(1 - \beta) \\ &= q \ln \frac{q}{p} + \left(\frac{p}{\beta} - q\right) \ln(1 - \beta \frac{q}{p}) + (1-q) \ln \frac{1-q}{1-p} + \left(\frac{1-p}{\beta} + q - 1\right) \ln(1 - \beta \frac{1-q}{1-p}) - \left(\frac{1}{\beta} - 1\right) \ln(1 - \beta) \\ &= \mathcal{D}_{\text{KL}}(q, p) + \left(\frac{p}{\beta} - q\right) \ln(1 - \beta \frac{q}{p}) + \left(\frac{1-p}{\beta} + q - 1\right) \ln(1 - \beta \frac{1-q}{1-p}) - \left(\frac{1}{\beta} - 1\right) \ln(1 - \beta) \\ &= \mathcal{D}_{\text{KL}}(q, p) + \left(\frac{p}{\beta} - q\right) \ln(1 - \beta \frac{q}{p}) + \left(\frac{1-p}{\beta} + q - 1\right) \ln(1 - \beta \frac{1-q}{1-p}) - \left[\left(\frac{p}{\beta} - q\right) + \left(\frac{1-p}{\beta} + q - 1\right)\right] \ln(1 - \beta) \\ &= \mathcal{D}_{\text{KL}}(q, p) + \left(\frac{p}{\beta} - q\right) \left[\ln(1 - \beta \frac{q}{p}) - \ln(1 - \beta)\right] + \left(\frac{1-p}{\beta} + q - 1\right) \left[\ln(1 - \beta \frac{1-q}{1-p}) - \ln(1 - \beta)\right] \\ &= \mathcal{D}_{\text{KL}}(q, p) + \left(\frac{p}{\beta} - q\right) \ln \frac{1 - \beta \frac{q}{p}}{1 - \beta} + \left(\frac{1-p}{\beta} + q - 1\right) \ln \frac{1 - \beta \frac{1-q}{1-p}}{1 - \beta} \\ &= \mathcal{D}_{\text{KL}}(q, p) + \frac{1-\beta}{\beta} \left[ \frac{p-\beta q}{1-\beta} \ln \frac{1-\beta \frac{q}{p}}{1-\beta} + \left(1 - \frac{p-\beta q}{1-\beta}\right) \ln \frac{1-\beta \frac{1-q}{1-p}}{1-\beta} \right] \\ &= \mathcal{D}_{\text{KL}}(q, p) + \frac{1-\beta}{\beta} \left[ \frac{p-\beta q}{1-\beta} \ln \frac{\frac{p-\beta q}{1-\beta}}{p} + \left(1 - \frac{p-\beta q}{1-\beta}\right) \ln \frac{1-\frac{p-\beta q}{1-\beta}}{1-p} \right] \\ &= \mathcal{D}_{\text{KL}}(q, p) + \frac{1-\beta}{\beta} \mathcal{D}_{\text{KL}}\left(\frac{p-\beta q}{1-\beta}, p\right). \end{aligned}$$

□

**Lemma S10.** *Let  $m, N, K$  be integers such that  $\lambda \leq m \leq N - \lambda$  and  $0 \leq K \leq N$ . We have*

$$F(k) = \frac{\alpha(k, K) \alpha(m-k, N-K)}{\alpha(m, N)} \leq e^{\frac{1}{6\lambda}} \sqrt{2\pi m \left(1 - \frac{m}{N}\right)},$$

for  $k = \max[0, K+m-N]$  and  $k = \min[m, K]$ .

*Proof.* First, let study the case  $k = \max[0, K+m-N]$ .

If  $0 \geq K+m-N$ , then  $F(0) = \frac{\alpha(m, N-K)}{\alpha(m, N)}$  increases according to  $K$ , and its maximum is reached at  $K = N-m$ . We have

$$F(0) \leq \frac{\alpha(m, m)}{\alpha(m, N)} = \frac{1}{\alpha(m, N)}.$$

If  $0 \leq K+m-N$ , then  $F(K+m-N) = \frac{\alpha(K+m-N, K) \alpha(N-K, N-K)}{\alpha(m, N)} = \frac{\alpha(K+m-N, K)}{\alpha(m, N)}$  decreases according to  $K$ , and its maximum is reached at  $K = N-m$ . Then

$$F(K+m-N) = F(0) \leq \frac{1}{\alpha(m, N)}.$$

Now, let us study the case  $k = \min[m, K]$ .

If  $m \leq K$ , then  $F(m) = \frac{\alpha(m, K)}{\alpha(m, N)}$  decreases according to  $K$ , and its maximum is reached at  $K = m$ . We have

$$F(m) \leq \frac{\alpha(m, m)}{\alpha(m, N)} = \frac{1}{\alpha(m, N)}.$$

If  $m \geq K$ , then  $F(K) = \frac{\alpha(K, K) \alpha(m-K, N-K)}{\alpha(m, N)} = \frac{\alpha(m-K, N-K)}{\alpha(m, N)}$  increases according to  $K$ , and its maximum is reached at  $K = m$ . Then

$$F(K) = F(m) \leq \frac{1}{\alpha(m, N)}.$$

Finally, by Lemma 3, we get

$$\frac{1}{\alpha(m, N)} \leq \frac{1}{\sqrt{\frac{N}{2\pi m(N-m)}} e^{-\frac{1}{12m} - \frac{1}{12(N-m)}}} = \sqrt{2\pi m \left(1 - \frac{m}{N}\right)} e^{\frac{1}{12m} + \frac{1}{12(N-m)}} \leq e^{\frac{1}{6\lambda}} \sqrt{2\pi m \left(1 - \frac{m}{N}\right)}.$$

□

**Lemma S11.** Let  $m, N, K$  be integers such that  $0 \leq m \leq N$  and  $0 \leq K \leq N$ . We have

$$\begin{aligned} \sum_{k \in \mathcal{K}_{mNK}^*} \sqrt{\left(\frac{1}{k} + \frac{1}{K-k}\right) \left(\frac{1}{m-k} + \frac{1}{(N-K)-(m-k)}\right)} &\leq 2 \sum_{k=1}^{m-1} \frac{1}{k} \\ &\leq 2(1 + \ln(m-1)), \end{aligned} \quad (20)$$

where

$$\mathcal{K}_{mNK}^* = \{\max[0, K+m-N] + 1, \dots, \min[m, K] - 1\},$$

and we have an equality at Line (20) when  $m = K = N - K$ .

*Proof.* First, examine the case where  $m = K = N - K$ .

$$\begin{aligned} &\sum_{k \in \mathcal{K}_{mNK}^*} \sqrt{\left(\frac{1}{k} + \frac{1}{K-k}\right) \left(\frac{1}{m-k} + \frac{1}{(N-K)-(m-k)}\right)} \\ &= \sum_{k \in \mathcal{K}_{mNK}^*} \sqrt{\left(\frac{1}{k} + \frac{1}{m-k}\right) \left(\frac{1}{m-k} + \frac{1}{m-(m-k)}\right)} = \sum_{k \in \mathcal{K}_{mNK}^*} \sqrt{\left(\frac{1}{k} + \frac{1}{m-k}\right) \left(\frac{1}{m-k} + \frac{1}{k}\right)} \\ &= \sum_{k \in \mathcal{K}_{mNK}^*} \left(\frac{1}{k} + \frac{1}{m-k}\right) = \sum_{k \in \mathcal{K}_{mNK}^*} \frac{1}{k} + \sum_{k \in \mathcal{K}_{mNK}^*} \frac{1}{m-k} = 2 \sum_{k \in \mathcal{K}_{mNK}^*} \frac{1}{k} = 2 \sum_{k=1}^{m-1} \frac{1}{k}. \end{aligned}$$

The last equality comes from the fact that when  $m = K = N - K$ , the set  $\mathcal{K}_{mNK}^*$  equals  $\{1, 2, \dots, m-1\}$ . The two sums are then equivalent.

Let us now examine all other cases. We distinguish 4 distinct cases, where each demonstration consists in using the case's inequality such that the expression's value raises.

*Case 1:*  $m \leq (N - K)$  and  $m \leq K$ .

$$\begin{aligned} &\sum_{k \in \mathcal{K}_{mNK}^*} \sqrt{\left(\frac{1}{k} + \frac{1}{K-k}\right) \left(\frac{1}{m-k} + \frac{1}{(N-K)-(m-k)}\right)} \\ &\leq \sum_{k \in \mathcal{K}_{mNK}^*} \sqrt{\left(\frac{1}{k} + \frac{1}{m-k}\right) \left(\frac{1}{m-k} + \frac{1}{(N-K)-(m-k)}\right)} \\ &\leq \sum_{k \in \mathcal{K}_{mNK}^*} \sqrt{\left(\frac{1}{k} + \frac{1}{m-k}\right) \left(\frac{1}{m-k} + \frac{1}{m-(m-k)}\right)} = \sum_{k \in \mathcal{K}_{mNK}^*} \sqrt{\left(\frac{1}{k} + \frac{1}{m-k}\right) \left(\frac{1}{m-k} + \frac{1}{k}\right)} \\ &= \sum_{k \in \mathcal{K}_{mNK}^*} \left(\frac{1}{k} + \frac{1}{m-k}\right) = \sum_{k \in \mathcal{K}_{mNK}^*} \frac{1}{k} + \sum_{k \in \mathcal{K}_{mNK}^*} \frac{1}{m-k} = \sum_{k=1}^{m-1} \frac{1}{k} + \sum_{k=1}^{m-1} \frac{1}{m-k} = 2 \sum_{k=1}^{m-1} \frac{1}{k}. \end{aligned}$$

*Case 2:*  $m \leq (N - K)$  and  $m > K$ .

$$\begin{aligned} &\sum_{k \in \mathcal{K}_{mNK}^*} \sqrt{\left(\frac{1}{k} + \frac{1}{K-k}\right) \left(\frac{1}{m-k} + \frac{1}{(N-K)-(m-k)}\right)} \\ &\leq \sum_{k \in \mathcal{K}_{mNK}^*} \sqrt{\left(\frac{1}{k} + \frac{1}{K-k}\right) \left(\frac{1}{K-k} + \frac{1}{(N-K)-(m-k)}\right)} \\ &\leq \sum_{k \in \mathcal{K}_{mNK}^*} \sqrt{\left(\frac{1}{k} + \frac{1}{K-k}\right) \left(\frac{1}{K-k} + \frac{1}{m-(m-k)}\right)} = \sum_{k \in \mathcal{K}_{mNK}^*} \sqrt{\left(\frac{1}{k} + \frac{1}{K-k}\right) \left(\frac{1}{K-k} + \frac{1}{k}\right)} \\ &= \sum_{k \in \mathcal{K}_{mNK}^*} \left(\frac{1}{k} + \frac{1}{K-k}\right) = \sum_{k=1}^{K-1} \left(\frac{1}{k} + \frac{1}{K-k}\right) = \sum_{k=1}^{K-1} \frac{1}{k} + \sum_{k=1}^{K-1} \frac{1}{K-k} = 2 \sum_{k=1}^{K-1} \frac{1}{k} < 2 \sum_{k=1}^{m-1} \frac{1}{k}. \end{aligned}$$

Case 3:  $m > (N - K)$  and  $m \leq K$ .

$$\begin{aligned}
 & \sum_{k \in \mathcal{K}_{mNK}^*} \sqrt{\left(\frac{1}{k} + \frac{1}{K-k}\right) \left(\frac{1}{m-k} + \frac{1}{(N-K)-(m-k)}\right)} \\
 & \leq \sum_{k \in \mathcal{K}_{mNK}^*} \sqrt{\left(\frac{1}{k} + \frac{1}{m-k}\right) \left(\frac{1}{m-k} + \frac{1}{(N-K)-(m-k)}\right)} \\
 & \leq \sum_{k \in \mathcal{K}_{mNK}^*} \sqrt{\left(\frac{1}{(N-K)-(m-k)} + \frac{1}{m-k}\right) \left(\frac{1}{m-k} + \frac{1}{(N-K)-(m-k)}\right)} \\
 & = \sum_{k \in \mathcal{K}_{mNK}^*} \left(\frac{1}{(N-K)-(m-k)} + \frac{1}{m-k}\right) = \sum_{k=m-N+K+1}^{m-1} \left(\frac{1}{(N-K)-(m-k)} + \frac{1}{m-k}\right) \\
 & = 2 \sum_{k=m-N+K+1}^{m-1} \frac{1}{m-k} < 2 \sum_{k=1}^{m-1} \frac{1}{m-k} = 2 \sum_{k=1}^{m-1} \frac{1}{k}.
 \end{aligned}$$

Case 4:  $m > (N - K)$  and  $m > K$ .

$$\begin{aligned}
 & \sum_{k \in \mathcal{K}_{mNK}^*} \sqrt{\left(\frac{1}{k} + \frac{1}{K-k}\right) \left(\frac{1}{m-k} + \frac{1}{(N-K)-(m-k)}\right)} \\
 & \leq \sum_{k \in \mathcal{K}_{mNK}^*} \sqrt{\left(\frac{1}{k} + \frac{1}{K-k}\right) \left(\frac{1}{K-k} + \frac{1}{(N-K)-(m-k)}\right)} \\
 & \leq \sum_{k \in \mathcal{K}_{mNK}^*} \sqrt{\left(\frac{1}{(N-K)-(m-k)} + \frac{1}{K-k}\right) \left(\frac{1}{K-k} + \frac{1}{(N-K)-(m-k)}\right)} \\
 & = \sum_{k \in \mathcal{K}_{mNK}^*} \left(\frac{1}{(N-K)-(m-k)} + \frac{1}{K-k}\right) = \sum_{k=m-N+K+1}^{K-1} \left(\frac{1}{(N-K)-(m-k)} + \frac{1}{K-k}\right) \\
 & = 2 \sum_{k=m-N+K+1}^{K-1} \frac{1}{K-k} \leq 2 \sum_{k=1}^{K-1} \frac{1}{K-k} = 2 \sum_{k=1}^{K-1} \frac{1}{k} \leq 2 \sum_{k=1}^{m-1} \frac{1}{k}.
 \end{aligned}$$

For each case, we showed that the expression is lower or equal than  $2 \sum_{k=1}^{m-1} \frac{1}{k}$ . Using the approximation by definite integral technique, we obtain as needed

$$2 \sum_{k=1}^{m-1} \frac{1}{k} \leq 2 \left(1 + \int_1^{m-1} \frac{1}{x} dx\right) = 2(1 + \ln(m-1)).$$

□

**Theorem S12** (Fixed version of [Derbeko et al. \[2004\]](#), Theorem 18). *For any set  $Z$  of  $N$  examples, for any set  $\mathcal{H}$  of classifiers, for any prior distribution  $P$  on  $\mathcal{H}$ , for any  $\delta \in (0, 1]$ , with a probability at least  $1 - \delta$  over the choice  $S$  of  $m$  examples among  $Z$ ,*

$$\forall Q \text{ on } \mathcal{H}: \quad R_Z(G_Q) \leq R_S(G_Q) + \sqrt{\frac{1 - \frac{m}{N}}{2(m-1)}} \left[ \text{KL}(Q\|P) + \ln \frac{m}{\delta} + 7 \ln(N+1) \right].$$

*Proof.* Let us use the shortcut notations  $R_S = R_S(G_Q)$  and  $R_Z = R_Z(G_Q)$ . We start from Equation (17) of [Derbeko et al. \[2004\]](#):

$$\mathcal{D}_{\text{KL}}(R_S, R_Z) + \frac{1 - \frac{m}{N}}{\frac{m}{N}} \mathcal{D}_{\text{KL}}\left(\frac{R_Z - \frac{m}{N}R_S}{1 - \frac{m}{N}}, R_Z\right) - \frac{7}{m} \log(N+1) \leq \frac{\text{KL}(Q\|P) + \ln \frac{m}{\delta}}{m-1}.$$

Applying Pinsker's inequality ( $\mathcal{D}_{\text{KL}}(q, p) \geq 2(q-p)^2$ ) twice, we get

$$\begin{aligned} \mathcal{D}_{\text{KL}}(R_S, R_Z) + \frac{1 - \frac{m}{N}}{\frac{m}{N}} \mathcal{D}_{\text{KL}}\left(\frac{R_Z - \frac{m}{N}R_S}{1 - \frac{m}{N}}, R_Z\right) &\geq 2(R_S - R_Z)^2 + 2\left(\frac{N}{m} - 1\right) \left(\frac{R_Z - \frac{m}{N}R_S}{1 - \frac{m}{N}} - R_Z\right)^2 \\ &= \frac{2(R_S - R_Z)^2}{1 - \frac{m}{N}}. \end{aligned}$$

Hence, the result is obtained by isolating  $R_Z$  in

$$\frac{2(R_S - R_Z)^2}{1 - \frac{m}{N}} - \frac{7}{m} \log(N+1) \leq \frac{\text{KL}(Q\|P) + \ln \frac{m}{\delta}}{m-1}.$$

□

**Remark.** Note that [Derbeko et al. \[2004\]](#) state their result as bound on  $R_U(G_Q)$ , *i.e.*, a bound on the risk on the unlabeled examples. As

$$R_Z(h) = \frac{1}{N} \left( mR_S(h) + (N-m)R_U(h) \right),$$

the statement of [Theorem S12](#) above can be directly converted from a bound on  $R_Z(G_Q)$  to a bound of  $R_U(G_Q)$ . We then have

$$\frac{1}{N} \left( mR_S(h) + (N-m)R_U(h) \right) \leq R_S(G_Q) + \sqrt{\frac{1 - \frac{m}{N}}{2(m-1)}} \left[ \text{KL}(Q\|P) + \ln \frac{m}{\delta} + 7 \ln(N+1) \right],$$

and

$$R_U(h) \leq R_S(G_Q) + \sqrt{\frac{1}{2(m-1)(1 - \frac{m}{N})}} \left[ \text{KL}(Q\|P) + \ln \frac{m}{\delta} + 7 \ln(N+1) \right].$$

## More Empirical Study of different $\mathcal{D}$ -functions

We show results similar to Figure 1, this time considering  $R_S(G_Q) = 0.1$  and  $R_S(G_Q) = 0.01$  in Figures 2 and 3. As these figures are generated in exactly the same fashion than Figure 1, we omit unnecessary explanation.

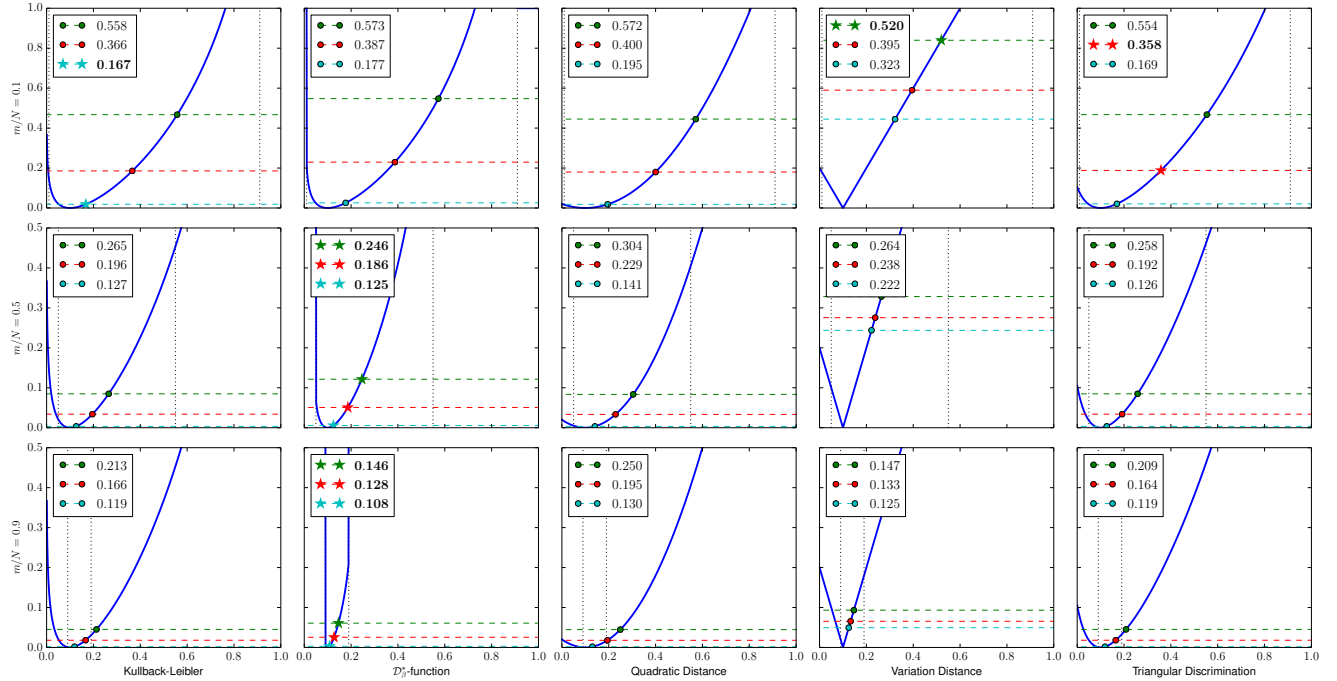

Figure 2: Study of the behavior of bounds obtained by Theorem 5. All graphics consider  $R_S(G_Q) = 0.1$ ,  $\text{KL}(Q||P) = 5$  and  $\delta = 0.05$ .

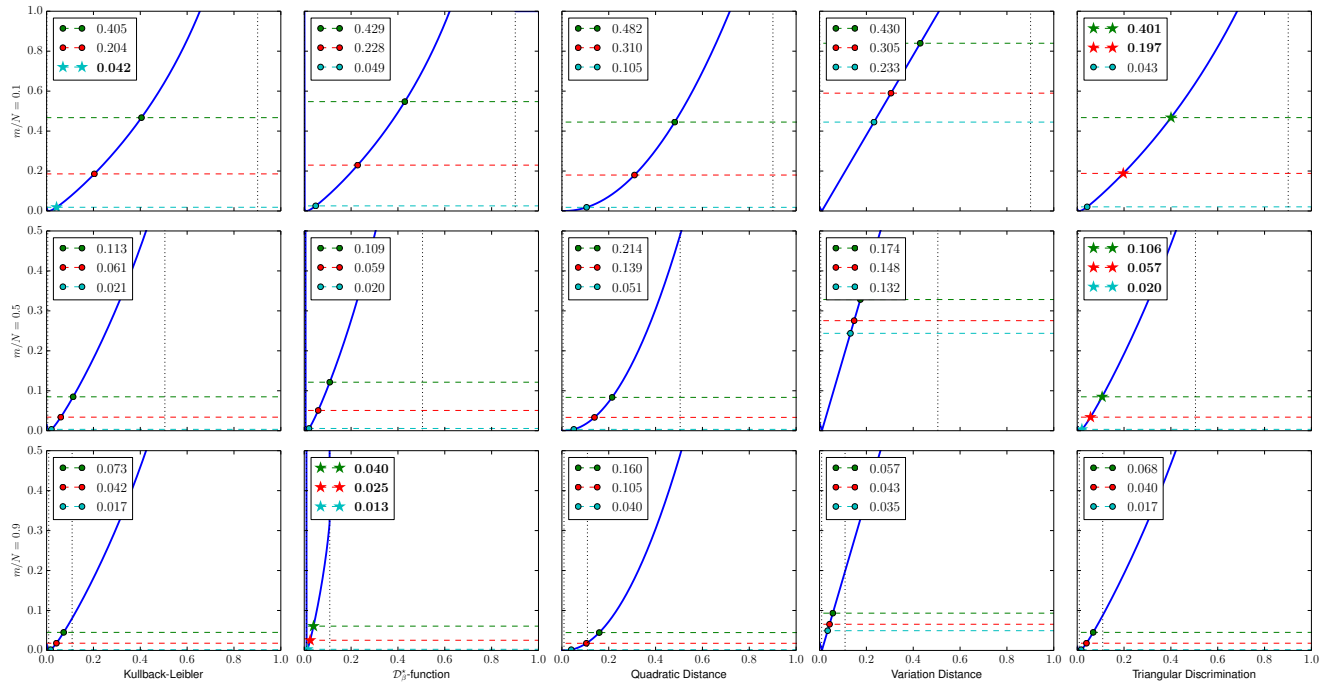

Figure 3: Study of the behavior of bounds obtained by Theorem 5. All graphics consider  $R_S(G_Q) = 0.01$ ,  $KL(Q||P) = 5$  and  $\delta = 0.05$ .
